# Supplementary material
Source: PubMed Central journal article supplement (PMC3375958)
Supplement: supp_pp.112.197020_197020Supplemental_data_for_resubmission.pdf [file supp_pp.112.197020_197020Supplemental_data_for_resubmission.pdf]

**Supplemental data**

Supplemental Figure S1

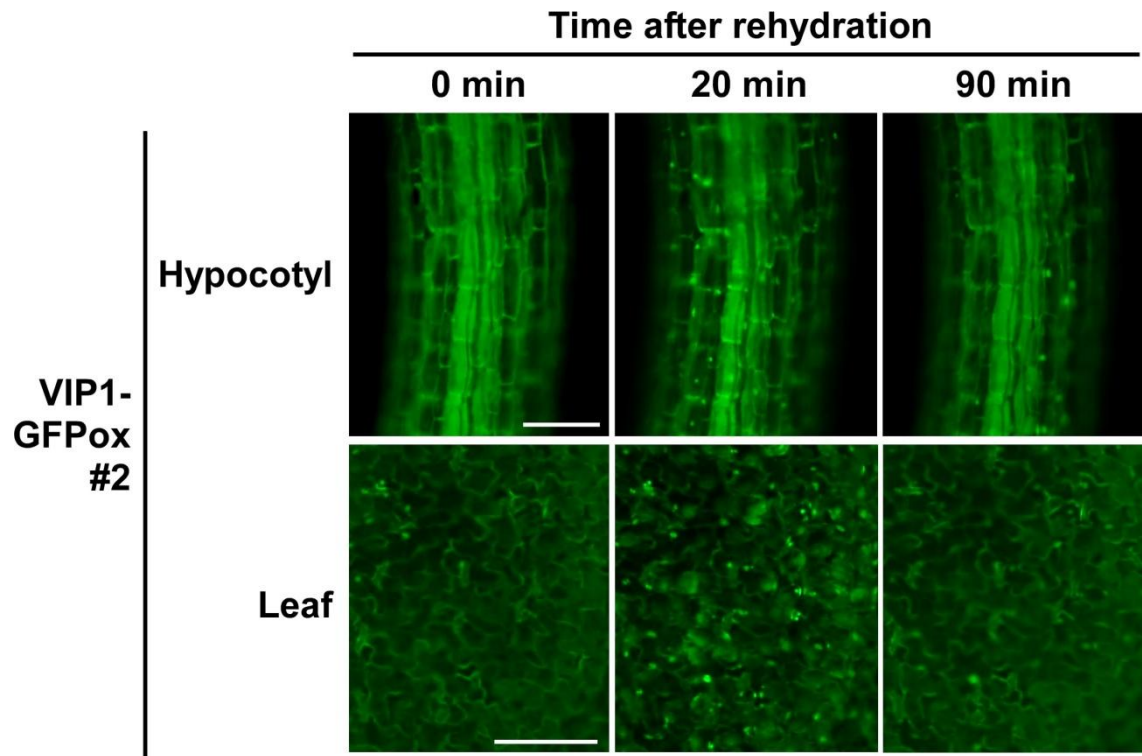

**Supplemental Figure S1.** Turgor-dependent translocation of VIP1-GFP in a hypocotyl and a leaf. Hypocotyls and leaves of VIP1-GFPox #2 plants were observed by epifluorescent microscopy at the indicated time points after being submerged in 20 mM Tris-HCl, pH 6.8 (rehydration). Scale bars = 100  $\mu$ m.

Supplemental Figure S2

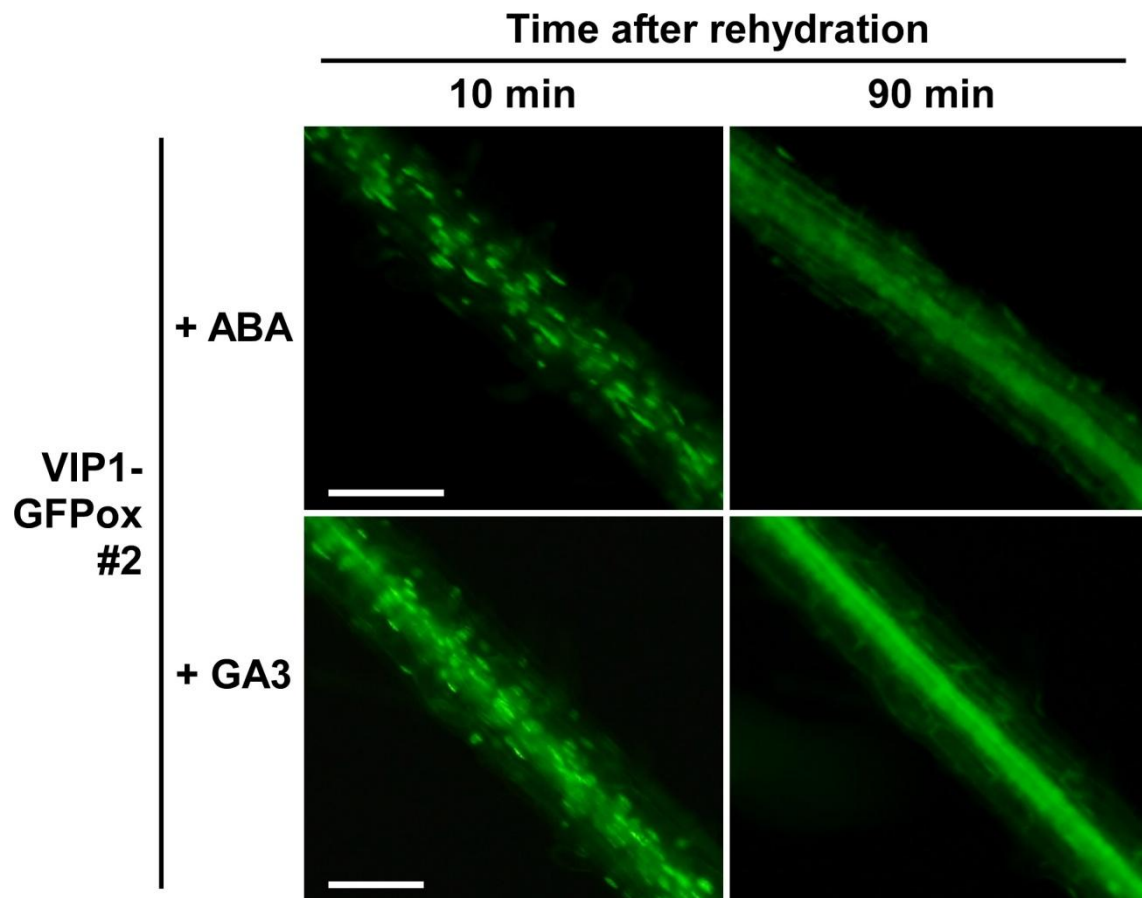

**Supplemental Figure S2.** Turgor-dependent translocation of VIP1-GFP is not affected by ABA or gibberellin A3. Roots of VIP1-GFPox #2 plants were observed by epifluorescent microscopy at the indicated time points after being submerged in 20 mM Tris-HCl, pH 6.8, containing 100  $\mu$ M ABA (+ ABA) or 0.1 mg/mL gibberellin A3 (+ GA3). Scale bars = 100  $\mu$ m.



Supplemental Figure S4

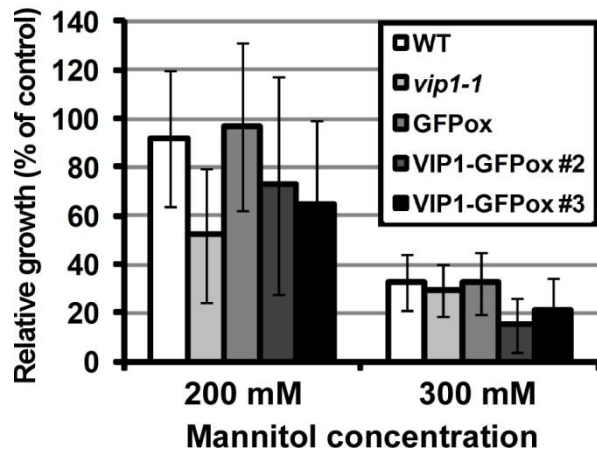

**Supplemental Figure S4.** Relative growths of VIP1-GFPox plants under mannitol stress conditions. In each genotype, the fresh weight under mannitol stress conditions was divided by the fresh weight under the control (mannitol-free) condition and the resultant value is shown as relative growth (thus the value is 100% for the control condition in all the genotypes). The values shown in Fig. 9B were used as the fresh weights for calculation.

Supplemental Figure S5

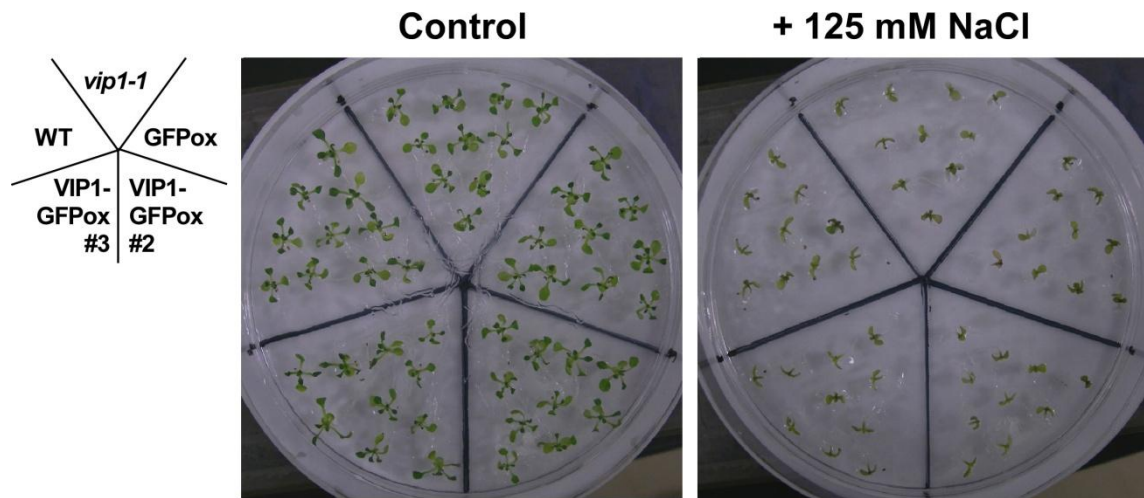

**Supplemental Figure S5.** Responses of VIP1-GFPox plants to NaCl stress. Images of

2-week-old plants grown on media with 0 (Control) and 125 mM NaCl.

Supplemental Figure S6

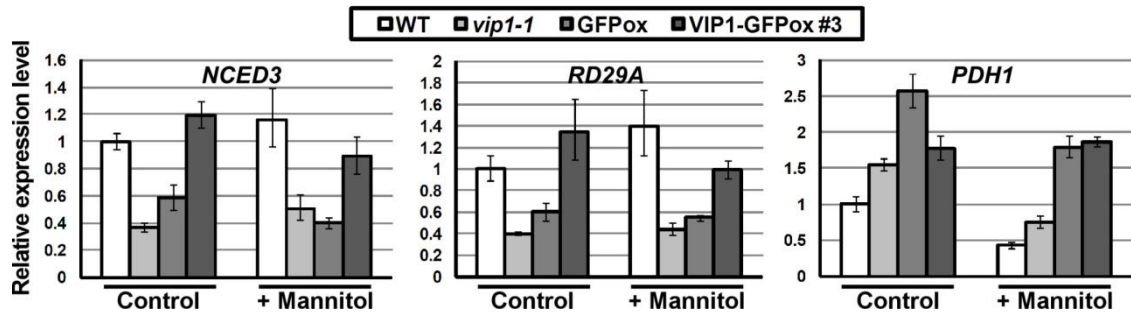

**Supplemental Figure S6.** Expression levels of dehydration-responsive genes, *NCED3*, *RD29A* and a rehydration-responsive gene, *PDH1*, under mannitol stress. Plants were grown for 3 weeks on media with 0 (Control) and 200 mM mannitol and used for RNA isolation and cDNA synthesis. Relative expression levels were calculated by the comparative  $C_T$  method using *UBQ5* as an internal control gene and the sample of wild type grown under the control condition as a reference sample. Experiments were performed in triplicate. Values are means  $\pm$  SE.

Supplemental Figure S7

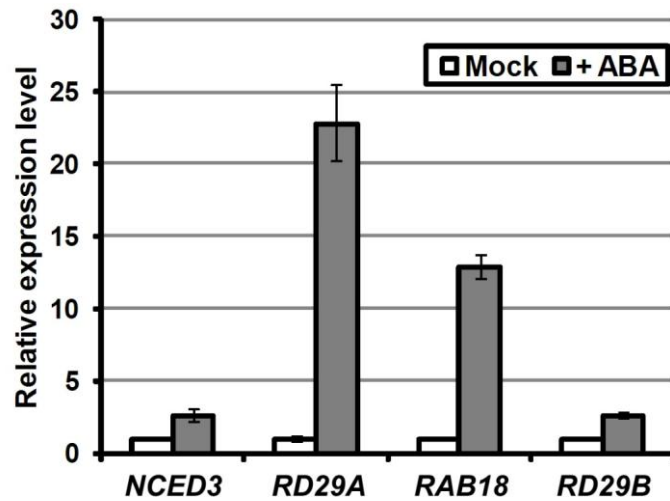

**Supplemental Figure S7.** Induction of *NCED3*, *RD29A*, *RAB18* and *RD29B* by ABA.

Two-week-old wild-type seedlings were incubated for 90 minutes at room temperature in 20 mM Tris-HCl, pH 6.8, with 0 (Mock) or 100  $\mu$ M ABA (+ ABA), and used for RNA isolation and cDNA synthesis. Relative expression levels were calculated by the comparative  $C_T$  method using *UBQ5* as an internal control gene and the mock-treatment sample as a reference sample.

Experiments were performed in triplicate. Values are means  $\pm$  SE.

Supplemental Table S1. Primer pairs used for RT-PCR analyses

| Gene                         |                   | Primer sequence (5' > 3') |
|------------------------------|-------------------|---------------------------|
| <i>VIP1-GFP</i>              | Fw                | CGGCGTCGTTTAATATCGAATC    |
|                              | Rv                | GTAGGTGGCATCGCCCTCGC      |
| <i>VIP1</i> (ORF)            | Fw                | CGGCGTCGTTTAATATCGAATC    |
|                              | Rv                | CAGCCTCTCTTGGTGAAATCC     |
| <i>VIP1</i> (UTR)            | Fw                | CGGCGTCGTTTAATATCGAATC    |
|                              | Rv                | GACCGATGTCGCCATGAACATA    |
| <i>VIP1</i><br>(for qRT-PCR) | Fw                | AGCGCTGCGGGATGAACTGA      |
|                              | Rv                | GGAGCGATGGCTGCCCGTTT      |
| <i>CYP707A1</i>              | Fw-1 <sup>a</sup> | GCCGCTAGAGACACGACGGC      |
|                              | Fw-2 <sup>a</sup> | TGGAACCCACTCGTGTCTGGA     |
|                              | Rv                | CCCGTCGCTCGCTCCAACAA      |
| <i>CYP707A3</i>              | Fw-1 <sup>a</sup> | CGCAAGAGACACGACGGCGA      |
|                              | Fw-2 <sup>a</sup> | TCGAAGTTGCGCCGAAACCGA     |
|                              | Rv                | GGCCCTACGATTGACCATCTGTACT |
| <i>MYB44</i>                 | Fw                | CACCACTTCGAGCCGCCACA      |
|                              | Rv                | CCTCCGACGAATCCGCCACC      |
| <i>NCED3</i>                 | Fw                | TGGCGAAGCAGGTCGTGTGA      |
|                              | Rv                | ACCAGCTGAGCTCGAACGGC      |
| <i>RD29A</i>                 | Fw                | GCCGGAATCTGACGGCGGTT      |
|                              | Rv                | CCCGTCGGCACATCCTTGTCG     |
| <i>RAB18</i>                 | Fw                | TCCAGCTCTAGCTCGGAGGATGA   |
|                              | Rv                | GGATCCCATGCCGCCCATCG      |
| <i>RD29B</i>                 | Fw                | AACCGAAGTCGCCACGGTCC      |
|                              | Rv                | CTCCGCCACTGCCTCCCAACT     |
| <i>PDH1</i>                  | Fw                | CCCTGGGTTGCAAGTCGCCA      |
|                              | Rv                | CCGGTGGCCATCATTCCCCG      |
| <i>UBQ5</i>                  | Fw                | GACGCTTCATCTCGTCC         |
|                              | Rv                | CCACAGGTTGCGTTAG          |

<sup>a</sup>Fw-1 primers were used for semi-quantitative RT-PCR and Fw-2 for quantitative RT-PCR.
